# Supplementary material for: Neural crest stem cells from human epidermis of aged donors maintain their multipotency in vitro and in vivo
Source: Sci Rep. 2019 Jul 5;9:9750. doi: 10.1038/s41598-019-46140-9 (PMC6611768; doi:10.1038/s41598-019-46140-9)
Supplement: Supplementary file 1 — supplementary figures, Figure S1, Figure S2 [file 41598_2019_46140_MOESM1_ESM.pdf]

# **Neural crest stem cells from human epidermis of aged donors maintain their multipotency in vitro and in vivo**

**Running Title:** Neural crest stem cells from aged skin

**Samaneh Moghadasi Boroujeni<sup>1</sup>, Alison Koontz<sup>2</sup>, Georgios Tseropoulos<sup>1</sup>, Laura Kerosuo<sup>3</sup>, Pihu Mehrotra<sup>1</sup>, Vivek K. Bajpai<sup>4</sup>, Surya Rajan Selvam<sup>5</sup>, Pedro Lei<sup>1</sup>, Marianne E. Bronner<sup>2</sup> and Stelios T. Andreadis<sup>1, 6, 7, §</sup>**

<sup>1</sup>Department of Chemical and Biological Engineering, University at Buffalo, Buffalo, NY 14260

<sup>2</sup> Division of Biology and Biological Engineering, California Institute of Technology, Pasadena, CA 91126

<sup>3</sup>NIH/NIDCR, Bethesda, MD 20892

<sup>4</sup> Chemical & Systems Biology, Stanford School of Medicine, Palo Alto, CA 94305

<sup>5</sup> Department of Psychological and Brain Sciences, University of Louisville, Kentucky, KY 40292

<sup>6</sup>Department of Biomedical Engineering, University at Buffalo, NY 14260

<sup>7</sup> Center of Excellence in Bioinformatics and Life Sciences, Buffalo, NY 14263

**Supplementary Figures**

**Fig S1**

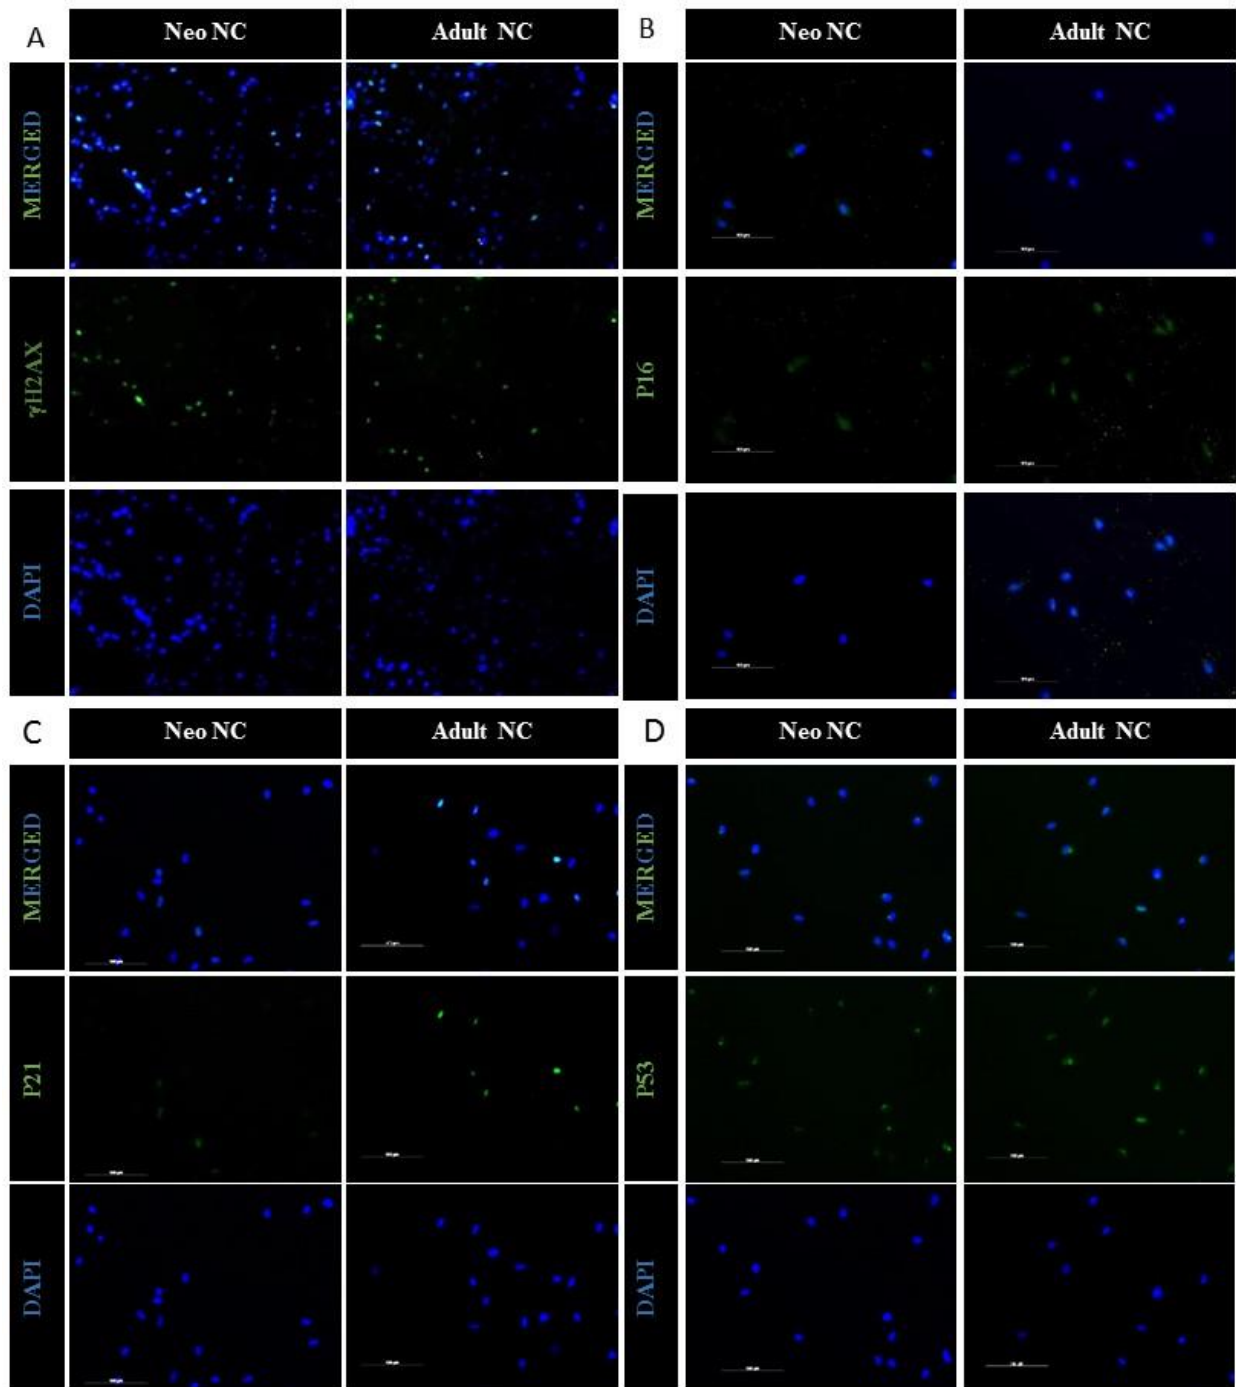

**Figure S1.** Immunostaining for senescence markers  $\gamma$ H2AX, P16, P21 and P53 in adult vs. neonatal KC-NC. Scale bar is 100 $\mu$ m.

**Fig S2**

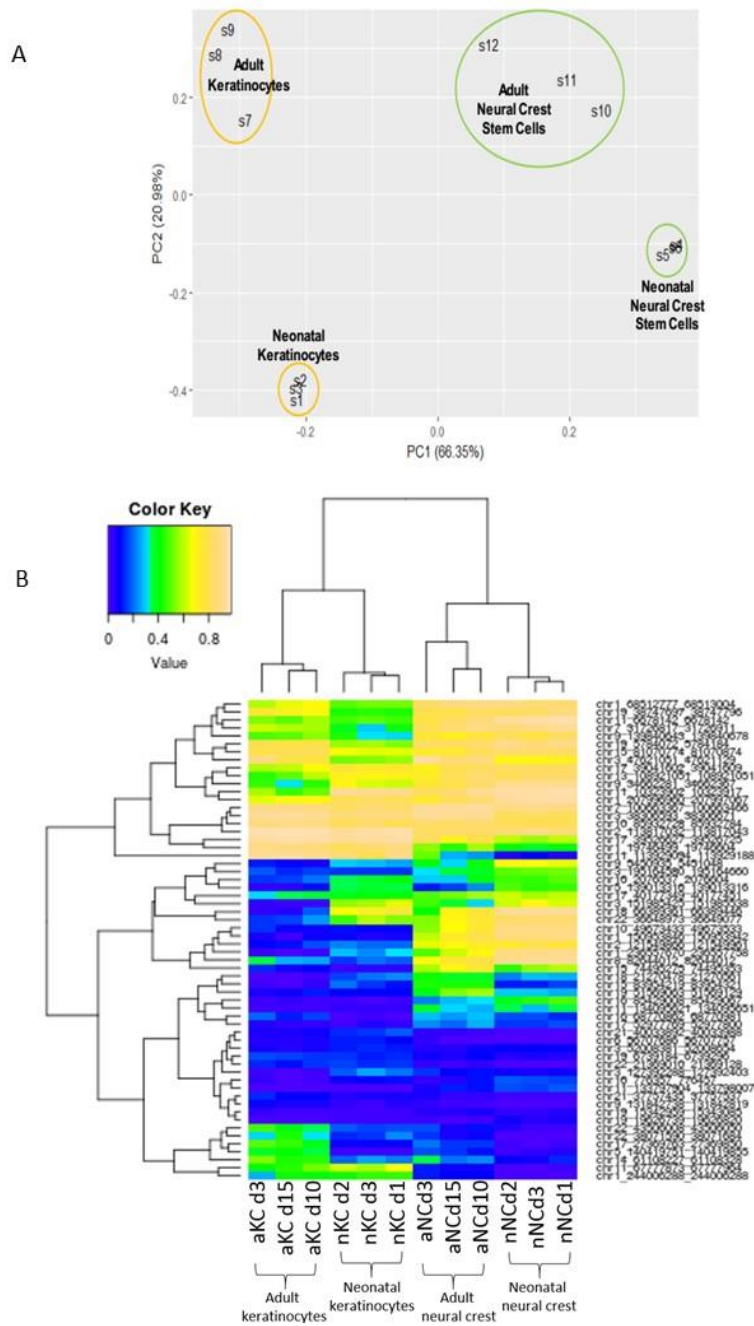

**Figure S2.** (A) Clustering analysis of DNA methylation from >500 age-associated gene loci in 12 human samples using multidimensional scaling. (B) Two-dimensional hierarchical clustering of gene loci that were differentially methylated between KC and KC-NC.
